# Supplementary material
Source: PubMed Central journal article supplement (PMC5530673)
Supplement: pnas.1702930114.sapp.pdf [file pnas.1702930114.sapp.pdf]

## Supplementary Information Appendix

### Materials and Methods

#### 1. GENOME SEQUENCING AND ASSEMBLY

##### 1.1 Sample collection for genome sequence

A male *Psammomys obesus* was obtained from Hadassah Medical School, Israel. All animals were handled in accordance to the regulations specified under the Protection of Animals Act by the authority in Denmark, European Union and Novo Nordisk A/S. The animal was sedated, euthanized and multiple tissues were dissected and snap frozen in liquid nitrogen for genomic DNA preparation. Genomic DNA was extracted from liver using the QIAGEN Genomic-tip 500/G kit following manufacturer's instructions.

##### 1.2 Initial Genome Sequencing

Multiple genomic libraries were prepared by standard procedures. Small insert-size libraries of 250bp, 500bp and 800bp were constructed and sequenced using 150bp paired end reads on the Illumina HiSeq2000 platform. After a basic genome survey the sequencing of the large insert-size libraries (2Kbp, 5Kbp, 10Kbp and 20Kbp) was performed (Table S1).

**Table S1.** Raw genomic DNA sequencing data metrics

| Insert size                  | Read pairs           | Read length | Raw bp                 |
|------------------------------|----------------------|-------------|------------------------|
| <b>Paired end libraries</b>  |                      |             |                        |
| 250bp                        | 197,653,655          | 2x150       | 59,296,096,500         |
| 250bp                        | 208,984,386          | 2x150       | 62,695,315,800         |
| 500bp                        | 171,439,814          | 2x150       | 51,431,944,200         |
| 800bp                        | 137,629,829          | 2x150       | 41,288,948,700         |
| <b>TOTAL</b>                 | <b>715,707,684</b>   |             | <b>214,712,305,200</b> |
| <b>GC-enriched libraries</b> |                      |             |                        |
| 550bp                        | 4,605,282            | 2x300       | 2,763,169,200          |
| 550bp                        | 4,064,520            | 2x300       | 2,438,712,000          |
| <b>TOTAL</b>                 | <b>8,669,802</b>     |             | <b>5,201,881,200</b>   |
| <b>Mate pair libraries</b>   |                      |             |                        |
| 2Kb                          | 206,747,237          | 2x49        | 20,261,229,226         |
| 2Kb                          | 171,782,906          | 2x49        | 16,834,724,788         |
| 2Kb                          | 152,607,390          | 2x49        | 14,955,524,220         |
| 5Kb                          | 173,390,804          | 2x49        | 16,992,298,792         |
| 5Kb                          | 167,200,992          | 2x49        | 16,385,697,216         |
| 5Kb                          | 157,372,673          | 2x49        | 15,422,521,954         |
| 10Kb                         | 196,302,639          | 2x49        | 19,237,658,622         |
| 10Kb                         | 200,677,190          | 2x49        | 19,666,364,620         |
| 20Kb                         | 190,067,357          | 2x49        | 18,626,600,986         |
| 20Kb                         | 164,286,952          | 2x49        | 16,100,121,296         |
| <b>TOTAL</b>                 | <b>1,780,436,140</b> |             | <b>174,482,741,720</b> |

### 1.3 Predicted genome size and sequencing coverage

Our initial genome assembly was done using SOAPdenovo2 (1) with a k-mer size of 41 (see section 1.4). For genome size estimation, k-mer counting of 41-mers was done using Jellyfish (2) and the resulting k-mer spectrum was plotted using ggplot2 (3). A single peak can be seen at depth 23 (Figure S1). Using this 41-mer distribution we calculated the genome size using the equation  $G=N*(L-k+1)/D$ , where N is the number of reads, L the read length, k the k-mer size and D the depth of the peak.

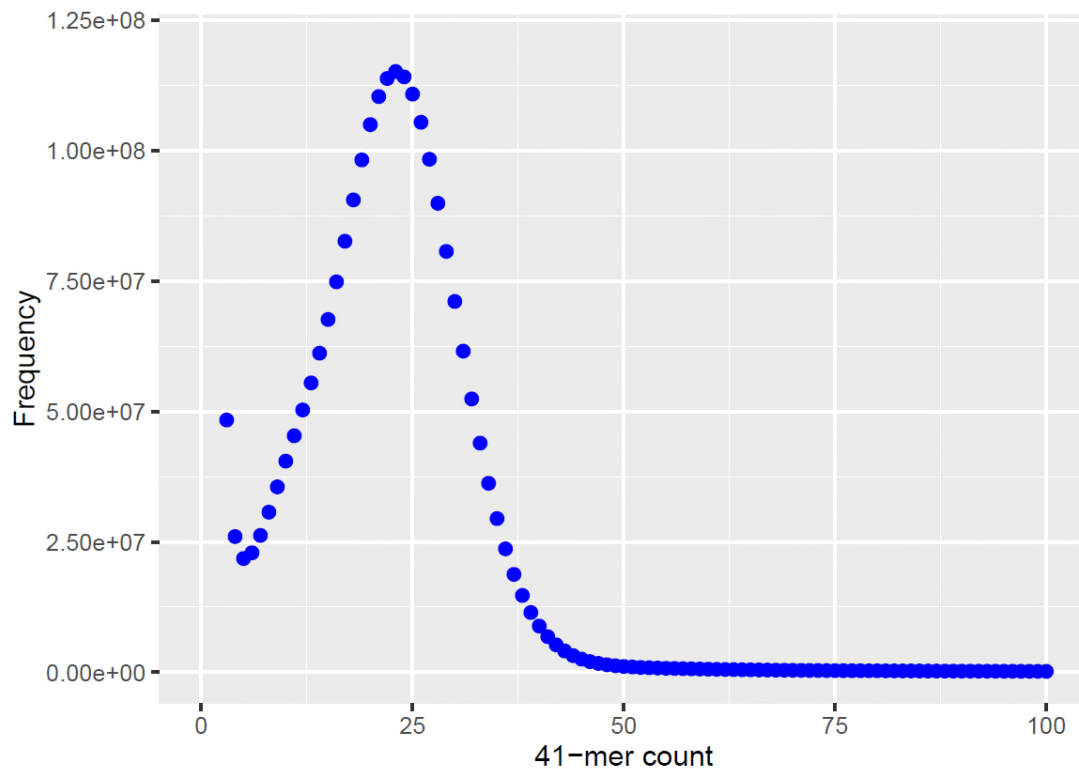

**Figure S1.** 41-mer distribution spectrum

The predicted genome size for *Psammomys obesus* using this method is 2.51 Gb, lower than the predicted genome sizes of other members of the Gerbillinae in the animal genome size database (4) but similar to the predicted genome sizes of other murid rodents, including the closely related *Acomys cahirinus*, and the total size of our final genome assembly (Table S2).

**Table S2.** Muridae predicted haploid genome sizes and karyotypes

| Species                      | Predicted haploid genome size (Gb) | Chromosome number |
|------------------------------|------------------------------------|-------------------|
| <i>Psammomys obesus</i>      | 2.51                               | 48                |
| <i>Meriones unguiculatus</i> | 3.64                               | 44                |
| <i>Gerbillus pyramidum</i>   | 4.00                               | 40                |
| <i>Gerbillus campestris</i>  | 3.64                               | 56                |
| <i>Acomys cahirinus</i>      | 2.64                               | 38                |
| <i>Mus musculus</i>          | 2.64                               | 40                |
| <i>Rattus norvegicus</i>     | 2.75                               | 42                |

We generated approximately 394 Gb of raw genomic sequence data (Table S1). Based on the predicted genome size of 2.51 Gb we achieved a total sequencing depth of 87.6X according to the Lander/Waterman equation (5) ( $C = LN/G$  where  $C$  is the estimated sequencing coverage,  $L$  is read length,  $N$  is the total number of reads sequenced and  $G$  represents the known (or estimated) haploid genome size).

#### 1.4 Initial Genome assembly

Raw genomic reads were filtered using the following steps: 1) Reads containing Ns or polyA tracts over 10% or more of their total length were discarded; 2) Small-insert library reads with 50 or more bases with a Q20 value of 7 or less and large-insert library reads with 15 or more bases below this threshold were filtered; 3) To remove reads with adapter contamination, reads with more than 10bp aligned to the adapter sequence (allowing up to 3bp mismatch) were discarded; 4) Small insert size reads in which read1 and read2 overlapped more than or equal to 10bp allowing 10% mismatch were discarded; 5) PCR duplicate reads, identified when read1 and read2 of two paired end reads are totally identical, were discarded; 6) Low quality bases at read ends were trimmed directly.

An initial genome assembly was generated using SOAPdenovo2 (1) with a k-mer size of 41 (see Table S3 for assembly metrics). Pairwise whole-genome alignments (WGA) of gerbil and mouse were carried out using LASTz (6) (version 1.02.00) with the parameters “--step=19 --hspthresh=2200 --inner=2000 --ydrop=3400 --gappedthresh=10000 C=2, T=2, H=2000, Y=3400, L=6000, and K=2200”. We used the Chain/Net package for post treatment. The gerbil genome was masked with RepeatMasker (7) (version 3.2.9) repeats at “-s” setting and TRF tandem repeats of period  $\leq 12$ . The mouse (mm9) repeat-masked genome was downloaded from UCSC (<http://genome.ucsc.edu>). Following whole genome alignment we identified a large contiguous region missing from our sand rat genome assembly, which contains 88 genes (orthologous between mouse and rat) and includes the ParaHox cluster (Figure S2).

Subsequent analysis of tissue transcriptomes (see Section 2) revealed that several missing genes were in fact expressed as gene transcripts, implying that our initial genome assembly was incomplete. As these transcripts were found to be high in Guanine and Cytosine base composition, we sought to re-sequence genomic DNA enriched for elevated GC content.

A

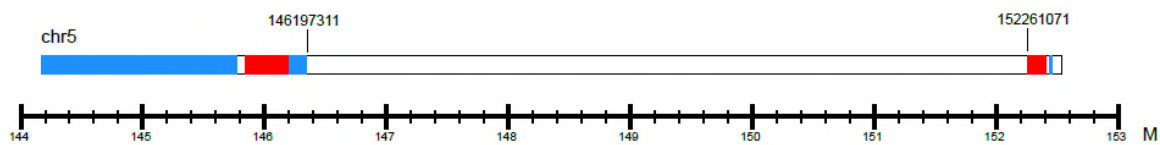

B

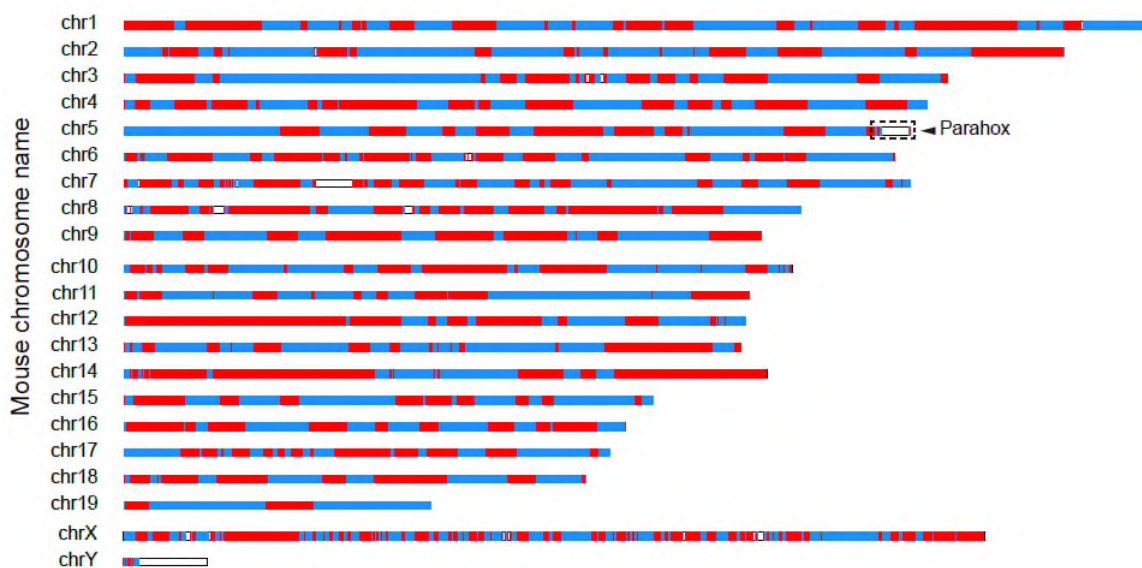

**Figure S2.** (A) Local liner map of the missing sand rat genomic region corresponding to the end of chromosome 5 and the beginning of chromosome 8 of mouse. (B) Local lastz alignment of the sand rat initial genome assembly to the mouse genome. The missing ParaHox region corresponding to the syntenic region on mouse chromosome 5 is indicated. Blue and red blocks indicate different sand rat genomic scaffolds aligning to the mouse genome.

### 1.5 GC-enriched DNA sequencing

GC-enriched DNA samples were obtained using Caesium Chloride (CsCl) gradient centrifugation. 5ug of Sand rat genomic DNA in 1M TE was sheared to a size of 10 Kb using Covaris g-tubes (#520079). In order to estimate the GC content of resulting sand rat DNA fractions, a mixture of *Escherichia coli* genomic DNA (Obtained in-house using the Roche DNA isolation kit for cells and tissues; Roche #11814770001) and *Micrococcus luteus* genomic DNA (Sigma #D8259-5MG) was also prepared in parallel to act as a "GC content reference" (*E. coli* 50% GC; *M. luteus* 70% GC). DNA samples were added to 13ml quick-seal tubes and filled with 1g/ml CsCl dissolved in 1M TE, without ethidium bromide. Tubes were subsequently sealed and spun using a Beckman Coulter Optima XPN-80

ultracentrifuge with a Beckman Type 70.1 Ti rotor at 40,000 RPM for 67 hours at 20°C with no brake for deceleration so as not to disrupt the CsCl isopycnic density gradient. Each tube was then decanted into a series of Eppendorf tubes (roughly 5 drops per tube) after puncturing the tube top and bottom with a hypodermic needle. After verification on a 0.7% agarose gel and comparison to the *E. coli* + *M. luteus* DNA distribution, sand rat DNA samples were pooled to result in GC rich (60-65% GC) and very GC rich (+65%) DNA fractions. These samples were then purified by dialysis using Novagen D-tube Dialyzer Midi MWCO 3.5 kDa dialysis columns (Novagen #71506-3) in 2 litres of 1M TE for 24 hours (with intermittent TE changes), concentrated using the Qiagen QIAquick PCR purification kit and eluted into 20µl of Qiagen elution buffer EB. The two DNA samples were used for preparation of 550 bp insert TruSeq DNA sequencing libraries at the Oxford Genomics centre (Wellcome Trust Centre for Human Genetics, Oxford, UK) and sequenced on the Illumina MiSeq platform using 2x300bp paired-end reads (Table S1).

### **1.6 Sand rat Pdx1 initial discovery**

The GC-enriched Miseq reads were merged using FLASH (8) (v1.2.11). Subsequently, all merged MiSeq reads and all Illumina paired-end reads were re-mapped to the initial genome assembly using Bowtie2 (9) (v2.1.0). Only unmapped reads were extracted from the resulting .bam file and then used to generate a local assembly using ABySS (10) with a k-mer size of 61. A local BLAST+ (11) survey detected a contig containing the *P. obesus* Pdx1 homeodomain.

### **1.7 Genome re-assembly and GC-enriched sequence incorporation**

The GC-enriched Miseq reads were filtered and trimmed using the same approach as described in section 1.4. The genome was then re-assembled using SOAPdenovo2 with k-mer size 41 incorporating the initial Illumina reads and the GC-enriched Miseq reads. Gaps were subsequently filled using GapCloser (1) (version 1.12). A local BLAST search revealed that this final genome assembly contained a full *Pdx1* gene sequence.

To ascertain the extent of GC bias in the original genomic sequencing reads, the sequence coverage per scaffold was calculated by mapping the original HiSeq reads only to the *P.obesus* final genome assembly using bowtie2 (9) followed by using the 'genomecov' utility of bedtools (12). This was then subsequently summarised using in-house scripts and compared to the %GC per scaffold (Figure S3). This revealed a sharp drop in coverage when GC content per scaffold deviates away from 30-50%. However, there were HiSeq reads present for GC-rich scaffolds, and the subsequent MiSeq read number was relatively low, indicating that it was not solely increasing the read coverage that allowed assembly; it is probable that the longer MiSeq read length was also important.

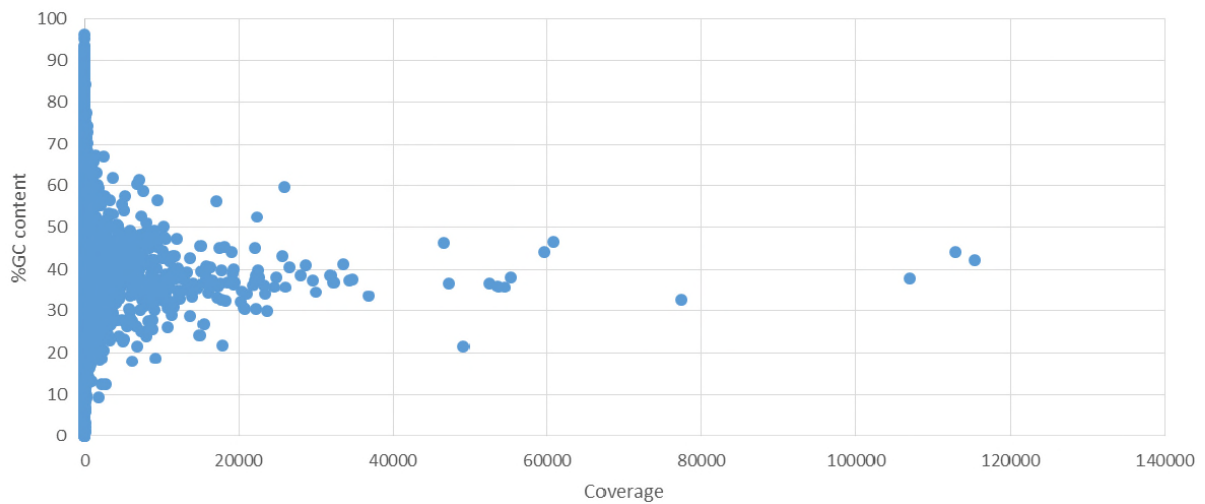

Figure S3. Scatter plot of coverage per scaffold against %GC content per scaffold for the final *Psammomys obesus* genome assembly.

#### Genome assembly assessment

Genome assembly metrics (Table S3) were obtained using a perl script from the Assemblathon 2 (13) (Currently available at <https://github.com/ucdavis-bioinformatics/assemblathon2-analysis>). BUSCO (Benchmarking Universal Single-Copy Orthologs) analysis (14) indicates that the final genome assembly is 89% complete.

**Table S3.** *Psammomys obesus* genome assembly metrics

|                                         | Initial assembly | Final assembly |
|-----------------------------------------|------------------|----------------|
| Number of scaffolds                     | 135,630          | 150,763        |
| Number of scaffolds >2 kb               | 2,020            | 1,737          |
| Total length of assembly (bp)           | 2,373,092,066    | 2,381,209,849  |
| Longest scaffold (bp)                   | 38,234,054       | 54,616,910     |
| Mean scaffold length (bp)               | 17,497           | 15,794         |
| Scaffold N50 (bp)                       | 8,843,897        | 10,461,538     |
| Scaffold L50                            | 83               | 63             |
| Contig N50 (bp)                         | 36,780           | 83,904         |
| Percentage of assembly in scaffolds (%) | 98.7             | 98.6           |
| G + C content (%)                       | 41.87            | 41.04          |
| Complete BUSCOs                         | 1,508            | 2,233          |
| Fragmented BUSCOs                       | 791              | 437            |
| Missing BUSCOs                          | 710              | 353            |

## 2. TRANSCRIPTOME SEQUENCING AND ASSEMBLY

### 2.1 Sample preparation

#### Pancreatic islets

Pancreatic islets were isolated from nine *P. obesus* individuals belonging to three groups (three individuals per group). The three groups were: diabetic animals fed on a high energy Diet (HEDD), non-diabetic animals fed on a high energy Diet (HEDND) and animals maintained on a low energy Diet (LED). Islet cells were isolated by standard collagenase methods (15) and cultured overnight to remove all exocrine and ductal cell contamination. Isolated islet cells were subsequently collected, briefly centrifuged and placed directly in the lysis buffer provided by the Qiagen RNA Easy kit. Total RNA was extracted using the Qiagen RNeasy Mini kit with on-column DNase treatment. RNA quality was assessed using the Agilent chip methods and only samples with a RIN value greater than 8 were used for RNA sequencing. Total RNA samples were enriched for messenger RNA using PolyA priming, cDNA was synthesized and different size libraries between 300 and 500bp were constructed for RNAseq. Libraries were both run individually and as pools on 16 lanes of the Illumina GAII sequencing platform at the Institute for Systems Biology (Seattle, USA).

#### Liver

Liver samples from six *P.obesus* individuals (two from each group of HEDD, HEDND and LED; see above) were dissected and snap frozen in liquid nitrogen. Total RNA was extracted using the Qiagen RNeasy Mini kit with on-column DNase treatment. RNA-seq libraries were prepared using the Illumina TruSeq RNA library preparation kit (v2 chemistry) following PolyA enrichment. Libraries were pooled and run on 2 lanes of the Illumina HiSeq2000 at the Beijing Genomics Institute using 2x90bp paired-end reads.

#### Duodenum

A 7-week old diabetes prone *P. obesus* individual and an adult *Meriones unguiculatus* individual were obtained from colonies maintained at Bangor University, UK. The animals were euthanized according to Schedule 1 of the Animals (Scientific procedures) Act 1986. Anterior duodenum samples were dissected and immediately snap frozen in liquid nitrogen and stored at -80°C until required. Total RNA was extracted using TRI Reagent (Sigma #T9424) with an additional on-column DNase step (Qiagen #79254) as described previously (16) and eluted into RNase-free water. Sequencing libraries were prepared using the Illumina TruSeq RNA library preparation kit with PolyA enrichment at the Wellcome Trust Centre for Human Genetics (Oxford, UK) and sequenced on 1/6<sup>th</sup> of a lane of the Illumina HiSeq4000 using 2x75bp paired-end reads (Table S4).

**Table S4.** RNA sequencing raw data metrics.

| Tissue                              | Paired-end reads | Read length (bp) | Total raw sequence (bp) |
|-------------------------------------|------------------|------------------|-------------------------|
| Pancreatic islets                   | 171,668,505      | 2x100            | 34,333,701,000          |
| Liver                               | 98,742,080       | 2x100            | 19,748,416,000          |
| Duodenum ( <i>P. obesus</i> )       | 62,563,996       | 2x75             | 9,384,599,400           |
| Duodenum ( <i>M. unguiculatus</i> ) | 43,543,534       | 2x75             | 6,531,530,100           |

## 2.2 Transcriptome assembly

Adapter contamination was removed using Trimmomatic (17) (version 0.33) and raw reads were trimmed using Sickle (18) (version 1.33). The transcriptomic data for pancreatic islets was assembled using Trans-ABYSS (19) (version 1.2.5) with multiple k-mer sizes (k=41 up to k=79 in increments of 2). Read data for liver and duodenum was assembled using Trinity (20). Open Reading Frame prediction was carried out using TransDecoder (21) (version 2.0.1) which included first identifying ORFs with homology to known proteins in the UniProt Swiss-Prot database (22) (last downloaded July 6<sup>th</sup> 2016) using blastp (11) (Table S5).

**Table S5.** Tissue transcriptome assembly metrics

|                                           | Pancreatic islets | Liver       | Duodenum (P. obesus) | Duodenum (M. unguiculatus) |
|-------------------------------------------|-------------------|-------------|----------------------|----------------------------|
| Number of contigs                         | 175,097           | 256,993     | 121,343              | 84,334                     |
| Total length                              | 134,549,058       | 334,473,169 | 111,092,270          | 73,420,368                 |
| Longest contig                            | 28,084            | 18,181      | 17,288               | 14,622                     |
| N50                                       | 1,286             | 3,208       | 2,036                | 1,758                      |
| Number of predicted ORFs                  | 84,633            | 139,947     | 41,963               | 34,094                     |
| Number of predicted full coding sequences | 17,989            | 98,462      | 21,365               | 13,009                     |

## 2.3 Detecting presence of GC rich genes

Local blast surveys for the missing genes were carried out using BLAST+ (11) (version 2.2.31) with query protein sequences downloaded from Ensembl and Genbank databases. We were able to recover 52 out of the 88 originally missing GC-rich genes, 29 of which are present in the predicted proteins derived from our final genome assembly (Table S6).

**Table S6.** Presence or absence of GC-rich genes/transcripts in the *Psammomys obesus* genome and transcriptomes

| Gene     | Tissue            |       |          | Present in predicted proteins |
|----------|-------------------|-------|----------|-------------------------------|
|          | Pancreatic islets | Liver | Duodenum |                               |
| Lmtk2    | ✓                 | ✓     | ✓        | ✓                             |
| Bhlha15  | ✓                 | ✗     | ✓        | ✓                             |
| Tecpr1   | ✓                 | ✓     | ✓        | ✓                             |
| Bri3     | ✓                 | ✓     | ✓        |                               |
| Baiap2l1 | ✓                 | ✓     | ✓        | ✓                             |



|                |   |   |   |   |
|----------------|---|---|---|---|
| Nptx2          | ✓ | ✗ | ✗ |   |
| Tmem130        | ✓ | ✗ | ✗ | ✓ |
| Zfp498         | ✗ | ✗ | ✗ |   |
| Trrap          | ✓ | ✓ | ✓ | ✓ |
| Smurf1         | ✓ | ✓ | ✓ | ✓ |
| Kpna7          | ✗ | ✗ | ✗ |   |
| Arpc1a         | ✓ | ✓ | ✓ | ✓ |
| Arpc1b         | ✗ | ✓ | ✓ | ✓ |
| Pdap1          | ✓ | ✗ | ✓ | ✓ |
| Bud31          | ✓ | ✓ | ✓ | ✓ |
| Ptcd1          | ✓ | ✓ | ✓ | ✓ |
| Cpsf4          | ✓ | ✓ | ✓ |   |
| Atp5j2         | ✗ | ✓ | ✓ |   |
| Rnf6           | ✗ | ✗ | ✗ |   |
| Cdk8           | ✓ | ✓ | ✓ |   |
| Wasf3          | ✗ | ✗ | ✗ |   |
| Gpr12          | ✗ | ✗ | ✗ |   |
| Usp12          | ✗ | ✗ | ✗ |   |
| Rpl21          | ✓ | ✓ | ✓ | ✓ |
| Rasl11a        | ✗ | ✗ | ✗ |   |
| Gtf3a          | ✓ | ✓ | ✓ |   |
| Mtif3          | ✗ | ✓ | ✗ |   |
| Lnx2           | ✗ | ✗ | ✗ |   |
| Polr1d         | ✓ | ✓ | ✓ | ✓ |
| Gsx1           | ✗ | ✗ | ✗ |   |
| Pdx1           | ✓ | ✗ | ✓ | ✓ |
| Cdx2           | ✗ | ✗ | ✓ | ✓ |
| Urad (Prhxn)   | ✗ | ✗ | ✗ |   |
| Flt3           | ✗ | ✗ | ✗ |   |
| Pan3           | ✗ | ✓ | ✓ | ✓ |
| Flt1           | ✗ | ✗ | ✗ |   |
| Pomp           | ✓ | ✓ | ✓ |   |
| Slc46a3        | ✗ | ✗ | ✗ |   |
| Mtus2          | ✗ | ✗ | ✗ |   |
| Slc7a1         | ✗ | ✗ | ✗ |   |
| Ubl3           | ✓ | ✓ | ✓ |   |
| Katnal1        | ✓ | ✓ | ✓ | ✓ |
| Hmgb1          | ✓ | ✓ | ✓ |   |
| Usp1           | ✓ | ✓ | ✗ |   |
| Alox5ap        | ✗ | ✓ | ✓ | ✓ |
| Medag (MEDA-4) | ✓ | ✓ | ✓ | ✓ |
| Tex26          | ✗ | ✗ | ✗ |   |
| B3glct         | ✓ | ✓ | ✓ | ✓ |

|          |   |   |   |   |
|----------|---|---|---|---|
| Hsph1    | x | x | x |   |
| Wdr95    | x | x | x |   |
| Rxfp2    | x | x | x |   |
| Fry      | x | x | x |   |
| Zfp958   | x | x | x |   |
| Cers4    | ✓ | ✓ | ✓ |   |
| Prr36    | x | x | x |   |
| Evi5l    | ✓ | ✓ | ✓ |   |
| Lrrc8e   | x | x | x |   |
| Map2k7   | ✓ | ✓ | ✓ |   |
| Tgfbr3l  | x | x | x |   |
| Snpc2    | ✓ | ✓ | x |   |
| Ctxn1    | x | x | x |   |
| Timm44   | ✓ | ✓ | ✓ | ✓ |
| Elavl1   | ✓ | ✓ | ✓ | ✓ |
| Ccl25    | x | x | ✓ |   |
| Clec4g   | x | x | x |   |
| Fcer2    | x | x | x |   |
| TrappC5  | ✓ | ✓ | ✓ | ✓ |
| Mcomp1   | x | x | x |   |
| Retn     | x | x | x |   |
| Stxbp2   | ✓ | ✓ | x |   |
| Pcp2     | x | x | x |   |
| Pet100   | x | x | x |   |
| Xab2     | ✓ | ✓ | ✓ | ✓ |
| Camsap3  | ✓ | ✓ | ✓ |   |
| Pnpla6   | ✓ | ✓ | ✓ |   |
| Zfp358   | x | x | x |   |
| Mcoln1   | ✓ | ✓ | ✓ |   |
| Pex11g   | ✓ | ✓ | x | ✓ |
| Arhgef18 | x | x | x |   |
| Insr     | ✓ | ✓ | ✓ | ✓ |
| Rfc3     | ✓ | ✓ | ✓ | ✓ |
| Stard13  | x | x | x |   |
| Kl       | x | x | x |   |
| Pds5b    | ✓ | ✓ | ✓ |   |
| N4bp2l2  | ✓ | ✓ | ✓ |   |
| N4bp2l1  | ✓ | x | ✓ |   |
| Brca2    | x | ✓ | x | ✓ |
| Zar1l    | x | x | x |   |

### 3. REPEAT ANNOTATION

Repetitive elements were annotated using RepeatMasker (23) (version open-4.0.5). A *de novo* repeat library was first generated using RepeatModeler (24) and was used for subsequent repeat annotation (Table S7). A total of 37.7% of bases in the sand rat genome were masked as repeats.

**Table S7.** Repeatmasker output for the sand rat final genome assembly.

| Repeat/TE class       | Number of elements | Length occupied (bp) | Percentage of sequence (%) |
|-----------------------|--------------------|----------------------|----------------------------|
| <b>SINEs</b>          | 1,420,596          | 187,571,594          | 7.88                       |
| Alu/B1                | 494,184            | 56,418,111           | 2.37                       |
| B2-B4                 | 676,137            | 107,700,139          | 4.52                       |
| IDs                   | 81,666             | 5,900,797            | 0.25                       |
| MIRs                  | 103,584            | 12,497,978           | 0.52                       |
| <b>LINEs</b>          | 748,856            | 425,985,711          | 17.89                      |
| LINE1                 | 678,340            | 414,208,719          | 17.39                      |
| LINE2                 | 56,297             | 9,804,836            | 0.41                       |
| L3/CR1                | 10,394             | 1,460,127            | 0.06                       |
| <b>LTR elements</b>   | 577,946            | 183,123,703          | 7.69                       |
| ERVL                  | 85,702             | 24,071,333           | 1.01                       |
| ERVL-MaLRs            | 283,757            | 90,679,360           | 3.81                       |
| ERV_classI            | 47,067             | 15,599,597           | 0.66                       |
| ERV_classII           | 156,826            | 51,810,173           | 2.18                       |
| <b>DNA elements</b>   | 143,219            | 28,587,362           | 1.20                       |
| hAT-Charlie           | 93,634             | 18,177,962           | 0.76                       |
| TcMar-Tigger          | 23,128             | 5,321,930            | 0.22                       |
| <b>Unclassified</b>   | 22,598             | 9,321,173            | 0.39                       |
| <b>Small RNA</b>      | 20,138             | 1,740,861            | 0.07                       |
| <b>Satellites</b>     | 8,572              | 1,418,652            | 0.06                       |
| <b>Simple repeats</b> | 1,104,046          | 50,694,653           | 2.13                       |
| <b>Low complexity</b> | 173,356            | 9,463,235            | 0.40                       |

As RepeatMasker annotates and quantifies repetitive sequences post-assembly, and therefore could underestimate repeat content in instances of collapsed repeats, we also used dnaPipeTE (25) for repeat analysis. This pipeline assembles sequences from a down-sampled selection of raw genomic reads (using this low-coverage data, repeated sequences will successfully assemble whilst single-copy sequence will not) followed by annotation and abundance estimation. We find no evidence of any repeat expansions in the sand rat which would explain the emergence of a large genomic region of elevated GC content (Figure S4).

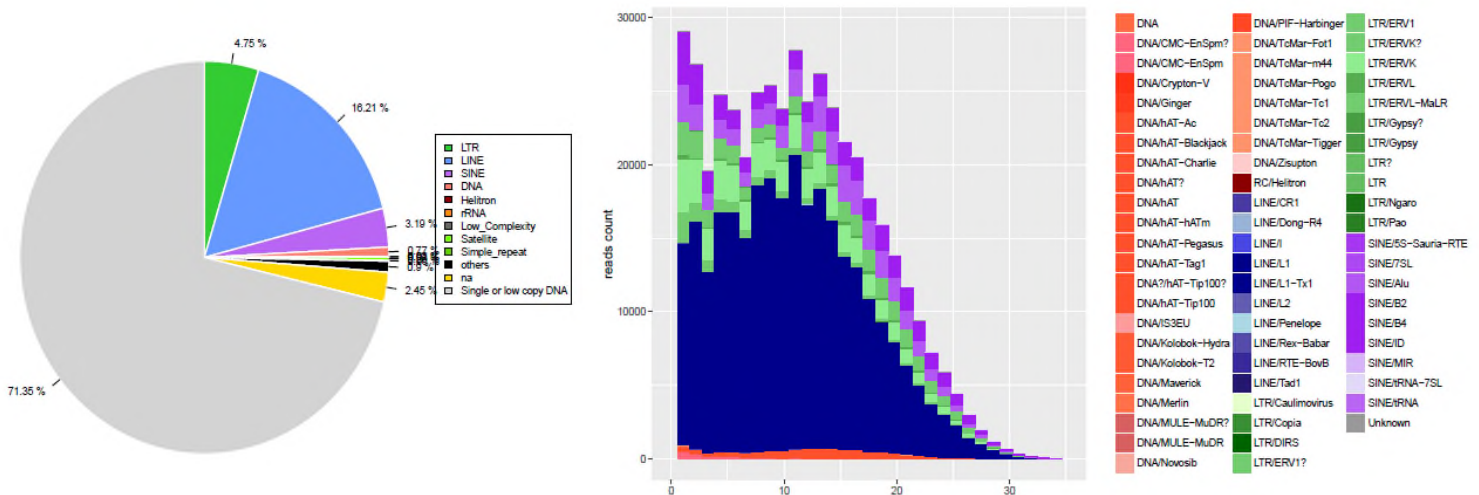

**Figure S4.** DnaPipeTE analysis of the sand rat raw genomic data. (A) Proportions of repeat element classes predicted in the sand rat genome and (B) repeat landscape of *Psammomys obesus*.

#### 4. PROTEIN-CODING GENE ANNOTATION

In order to predict the protein coding genes in the sand rat genome, we performed a multi-faceted analysis comprising multiple annotation methods. Using this approach we predict a total of 21,807 protein-coding genes in the sand rat genome, with an average gene size of 28,336 bp, an average exon number per gene of 8.4, and an average exon and intron length per gene of 1,604 bp and 26,733 bp respectively.

##### Ab initio prediction

Repetitive elements in the final genome assembly were first masked using RepeatMasker (23) followed by *ab initio* gene prediction with AUGUSTUS (26) (version 2.5.5) using the *Homo sapiens* parameters.

##### Homolog-based prediction

Homologous proteins from well annotated mammalian species genomes (mouse and human from Ensemble release-68) were mapped to the sand rat genome using TBLASTN (11) (BLASTall version 2.2.23) with an E-value cutoff  $1e^{-5}$ . The aligned sequence as well as its query protein were then filtered and passed to GeneWise (27) (version 2.2.0) for searching for accurate spliced alignments.

##### GLEAN integration

Output generated from the approaches mentioned above was integrated using GLEAN (28) to produce a consensus gene set.

##### Refinement using RNA-Seq data

We next sought to combine our consensus gene set produced using GLEAN with our RNA-seq data to improve the accuracy and confidence of our gene predictions. First, we aligned reads to the genome using TopHat (29) to identify candidate exon regions. Second, we identified donors and acceptors according to the predicted splicing sites. Then, we assembled the transcripts using Cufflinks (30) (version 1.3.0). Finally, based on these assembled candidate transcript sequences, the Open Reading

Frame (ORF) was predicted to acquire reliable transcripts using the HMM-based training parameter. These predictions were then combined with our GLEAN consensus gene set.

#### Manual annotation refinement

Several genes of interest (most notably *Pdx1* and *Cdx2*) were initially incompletely annotated after these previous methods. We therefore manually annotated these genes based upon sequence information found in the tissue transcriptomes.

### **5. 'PROTEIN DEVIATION INDEX' DIVERGENCE CALCULATIONS**

To calculate a Protein Deviation Index (PDI) of sequence divergence across the genome, we compared 1:1 orthologous proteins between sand rat, mouse and human (similar to a method used by Clark et al (31)). We first downloaded protein sets for mouse and human from Ensembl biomart (32). Reciprocal blasts were conducted using blastp (11) between the mouse and human orthologue sets and the predicted protein sequences from the *P. obesus* genome assembly with an e-value of 1e-6 and one target sequence specified. We then used a custom python script "reciblast.py" to extract lists of protein IDs for each reciprocal blast. We then used "build\_triplets.py" to generate amino acid sequence from all three species for each orthologous gene. Protein sequences were then aligned using MAFFT (33) (v7.123b). The script "percent\_id.py" was used to generate a table of the percentage identity between each aligned protein sequence. In order to increase stringency, any results from alignments which had an ungapped alignment length of less than 50% of the total alignment length were discarded. The ratios of mouse:human and mouse:sand rat were then divided to give the final protein deviation index value (Table S8). A histogram (Figure 2c) was plotted in R (34) using the package ggplot2 (3).

### **6. HOX COMPLEMENT AND DISTRIBUTION ON SCAFFOLDS**

We searched for the Hox complement of *Psammomys obesus* by first conducting local BLAST surveys using homeodomain protein sequences from mouse downloaded from HomeoDB (35) as query sequences. Matches were confirmed by reciprocal BLAST against the nr database and by visual inspection of the annotated scaffold. We find a complement of 39 Hox genes in our assembly, arranged in 4 clusters (Figure S5). This is an identical complement to those found in other rodents such as mouse and rat.

**Table S8.** Top 20 most divergent genes in the *Psammomys obesus* genome.

| Rank on PDI index | Gene name | Present in GC rich region |
|-------------------|-----------|---------------------------|
| 1                 | Pdx1      | ✓                         |
| 2                 | Pex11C    | ✓                         |
| 3                 | Medag     | ✓                         |
| 4                 | Imp4      | ✗                         |
| 5                 | Polr1d    | ✓                         |
| 6                 | TrappC5   | ✓                         |
| 7                 | Insr      | ✓                         |
| 8                 | Gsx1      | ✓                         |
| 9                 | Apbb3     | ✗                         |
| 10                | Ldoc1     | ✗                         |
| 11                | Sft2d3    | ✗                         |
| 12                | Arglu1    | ✗                         |
| 13                | Cmtm4     | ✗                         |
| 14                | Ift46     | ✗                         |
| 15                | Golga7b   | ✗                         |
| 16                | March5    | ✗                         |
| 17                | Trim56    | ✗                         |
| 18                | Pdap1     | ✓                         |
| 19                | Pianp     | ✗                         |
| 20                | Znf3      | ✗                         |

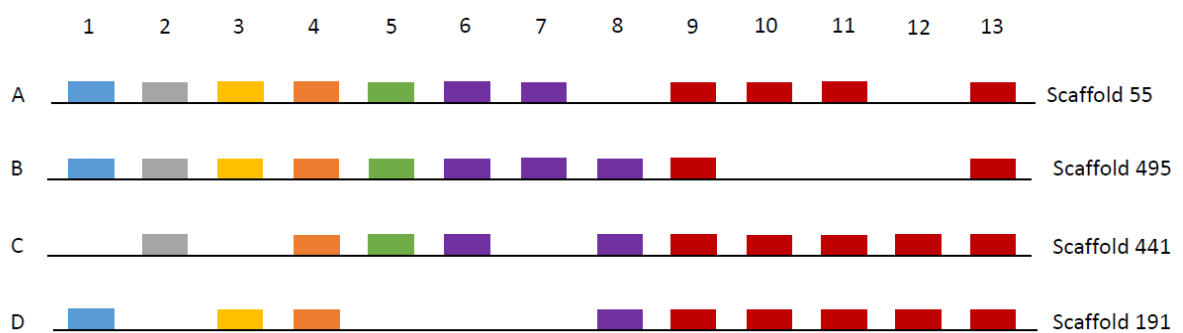

**Figure S5.** The Hox gene complement of *Psammomys obesus*.

## 7. IDENTIFYING SAND RAT PDX1

Following initial discovery of the putative highly divergent sand rat *Pdx1* homeodomain in the local ABySS genome assembly (section 1.6), we sought to confirm that this was indeed a real *Pdx1* sequence. Firstly, the contig containing the putative homeodomain was used as a query for a local blast search of the pancreatic islets and duodenum transcriptomes. Multiple contigs were found encoding a full coding sequence in both transcriptome assemblies. Reciprocal BLAST identifies this sequence as *Pdx1*, with a top hit to Yak (*Bos mutus*). We identified 47 point mutations in the homeodomain (compared to the closely related *Acomys cahirinus Pdx1*; Genbank Accession GQ179992), 27 of which were A/T to G/C mutations. Out of the 15 amino acid residue changes in the *P. obesus Pdx1* homeodomain (Figure 2a), 14 are caused by these G/C mutations. We also note extensive deletions throughout the *Pdx1* coding sequence in *P. obesus* (621 nucleotides) when compared to mouse (855 nucleotides), rat (852 nucleotides) and the spiny mouse *Acomys cahirinus* (861 nucleotides). Along with the presence of a homeodomain we also find a conserved hexapeptide domain present in the sand rat coding sequence, further suggesting that this transcript encodes *Pdx1*. Secondly, phylogenetic analysis was conducted using predicted amino acid sequences for sand rat and several other vertebrate and cephalochordate species aligned using MUSCLE (36) with maximum likelihood trees generated using MEGA5 (37) using the WAG model of protein evolution and 1,000 bootstraps. The resulting tree (Figure S6) puts sand rat *Pdx1* in a clade with other *Pdx1* sequences on a long branch. Finally, we found the putative *Pdx1* in our final genome assembly on a scaffold along with the genes *Rpl21*, *Cdx2*, *Cdk8*, *Atp5j2*, *Pdap1*, *Bud31*, *Ptcd1* and *Cpsf4*, confirming that it shares a syntenic genomic location when compared to other rodents (Table S9). We are therefore confident that we have identified a bone fide *Pdx1* gene in the sand rat.

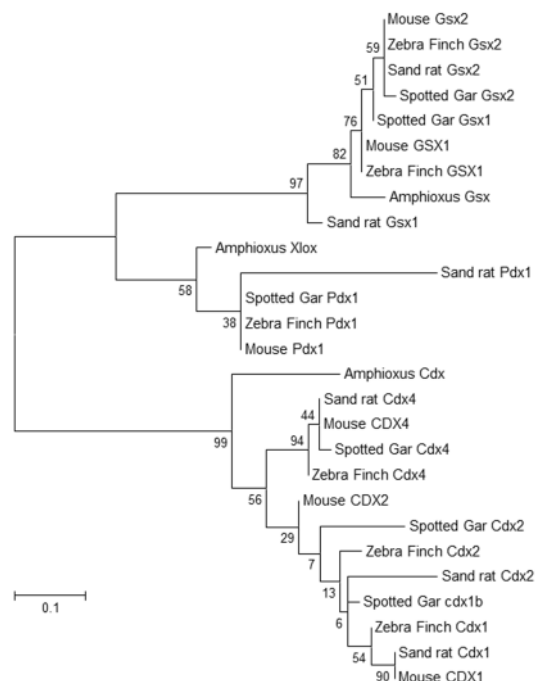

**Figure S6.** Maximum likelihood tree of ParaHox genes in sand rat (*Psammomys obesus*), mouse (*Mus musculus*), zebra finch (*Taeniopygia guttata*), spotted gar (*Lepisosteus oculatus*) and amphioxus (*Branchiostoma floridae*).

**Table S9.** Genes located on scaffold 966 in the sand rat genome assembly and their corresponding chromosomal locations in human, mouse and rat.

| Sand rat Scaffold 966 genes | Mouse                 | Rat              | Human          |
|-----------------------------|-----------------------|------------------|----------------|
| Pdap1                       | Chr5, 85.04 cM        | Chr12 p11        | 7q22.1         |
| Bud31                       | Chr5, 85.05 cM        | Chr12 p11        | 7q22.1         |
| Ptcd1                       | Chr5, 85.06 cM        | Chr12 p11        | 7q22.1         |
| Cpsf4                       | Chr5, 85.08 cM        | Chr12 p11        | 7q22.1         |
| Atp5j2                      | Chr5, 85.09 cM        | Chr12 p11        | 7q22.1         |
| Cdk8                        | Chr5, 85.19 cM        | Chr12 p11        | 13q12.13       |
| Rpl21                       | Chr5, 86.50 cM        | Chr12 p11        | 13q12.2        |
| <b>Pdx1</b>                 | <b>Chr5, 86.84 cM</b> | <b>Chr12 p11</b> | <b>13q12.2</b> |
| Cdx2                        | Chr5, 86.86 cM        | Chr12 p11        | 13q12.2        |

## 8. TYPE 2 DIABETES-RELATED GENES

To investigate if sand rats have accumulated deleterious mutations in additional genes affecting glucose metabolism or pancreatic function, we compiled a list of 45 candidate genes from human studies, including genes implicated in monogenic diabetes and genes for which coding sequence variants have been strongly associated with T2D in association studies (38-41). For each of the 45 genes, we identified the sand rat orthologue and calculated its divergence index as described above in Section 5. Nine of these genes are not in the 1:1:1 orthologue set generated in Section 5 and so it is not possible to assign them a PDI value. Moreover 3 genes were not found in our predicted protein set. Out of the total of 45 genes, Pdx1 is ranked as the number 1 most divergent gene, and is considerably more divergent when compared to other type 2 diabetes-related genes (Table S10).

## 9. GC CONTENT ACROSS THE MUTATIONAL HOTSPOT

Sand rat transcripts encoding the GC rich genes were identified by performing reciprocal blast surveys of the tissue transcriptomes using protein sequences downloaded from Ensembl and Genbank from mouse (*Mus musculus*), rat (*Rattus norvegicus*) and chinchilla (*Chinchilla lanigera*) as query sequences. Detected sand rat sequences were extracted and annotated manually to give full coding sequence. In any instance where using a full coding sequence was not possible, we aligned the sand rat sequence with the other remaining rodent sequences using ClustalW (42) and then only used contiguous aligned sequence between all species to generate GC content values. To get GC values we used the online GC calculator (<http://www.endmemo.com/bio/gc.php>). The gene order shown is that inferred for the ancestor of rodents, obtained through comparison of human, mouse and rat genomes; the sand rat gene order may not be identical and a lack of a single, contiguous scaffold containing this large genomic region precludes any definitive synteny analyses.



**Table S10.** Genes for which coding sequence variants are implicated in human type 2 diabetes, shown in order of “Protein Deviation Index” value.

| Gene    | P. obesus predicted protein ID | Blast confirmation | % ID to top BLAST hit | Position in divergence table | PDI ratio |
|---------|--------------------------------|--------------------|-----------------------|------------------------------|-----------|
| PDX1    | PobPdx1Augustus                | Y                  | 42                    | 1                            | 1.66      |
| PTF1A   | Pob_R017023                    | Y                  | 82                    | 225                          | 1.04      |
| PAX6    | Pob_R017876                    | Y                  | 97                    | 800                          | 1         |
| NeuroD1 | Pob_R021476                    | Y                  | 99                    | 1,503                        | 0.99      |
| PAX4    | Pob_R008854                    | Y                  | 82                    | 1,949                        | 0.99      |
| SLC19A2 | Pob_R009579                    | Y                  | 80                    | 1,909                        | 0.99      |
| SIRT1   | Pob_R018113                    | Y                  | 93                    | 1,576                        | 0.99      |
| KCNJ11  | Pob_R006022                    | Y                  | 98                    | 3,104                        | 0.98      |
| CISD2   | Pob_R020901                    | Y                  | 100                   | 3,275                        | 0.98      |
| PPIP5K2 | Pob_R000491                    | y                  | 97                    | 2,340                        | 0.98      |
| HNF1A   | Pob_R000788                    | Y                  | 97                    | 4,007                        | 0.97      |
| ABCC8   | Pob_R006023                    | Y                  | 97                    | 3,767                        | 0.97      |
| PPARG   | Pob_R011165                    | Y                  | 99                    | 4,225                        | 0.97      |
| GATA4   | Pob_R000356                    | Y                  | 94                    | 3,653                        | 0.97      |
| PAM     | Pob_R000489                    | Y                  | 93                    | 3,995                        | 0.97      |
| HNF4A   | Pob_R005138                    | Y                  | 99                    | 4,284                        | 0.96      |
| ASCC2   | Pob_R008713                    | Y                  | 93                    | 5,828                        | 0.95      |
| GCKR    | Pob_R002481                    | Y                  | 93                    | 6,564                        | 0.94      |
| MTNR1B  | Pob_R005880                    | Y                  | 84                    | 6,084                        | 0.94      |
| RFX6    | Pob_R003880                    | Y                  | 93                    | 6,404                        | 0.94      |
| MNX1    | Pob_R021615                    | Y                  | 96                    | 6,434                        | 0.94      |
| EIF2AK3 | Pob_R011489                    | Y                  | 93                    | 6,582                        | 0.94      |
| FOXP3   | Pob_R002782                    | Y                  | 93                    | 6,103                        | 0.94      |
| WFS1    | Pob_R008797                    | Y                  | 96                    | 7,692                        | 0.92      |
| MTMR3   | Pob_R008714                    | Y                  | 96                    | 7,534                        | 0.92      |
| BLK     | Pob_R000357                    | Y                  | 96                    | 7,977                        | 0.91      |
| GLIS3   | Pob_R005447                    | Y                  | 95                    | 8,408                        | 0.9       |
| THADA   | Pob_R000142                    | Y                  | 87                    | 8,310                        | 0.9       |
| RREB1   | Pob_R012867                    | Y                  | 92                    | 8,598                        | 0.9       |
| NGN3    | Pob_R012754                    | Y                  | 99                    | 9,021                        | 0.89      |
| KLF11   | Pob_R002344                    | Y                  | 91                    | 9,552                        | 0.87      |
| COBLL1  | Pob_R006508                    | Y                  | 81                    | 10,114                       | 0.84      |
| AIRE    | Pob_R017441                    | Y                  | 88                    | 10,195                       | 0.83      |
| SLC30A8 | Pob_R019570                    | Y                  | 91                    | Not in list of 1:1           |           |
| G6PC2   | Pob_R006488                    | Y                  | 90                    | Not in list of 1:1           |           |
| GCK     | Pob_R008369                    | Y                  | 95                    | Not in list of 1:1           |           |
| HNF1B   | Pob_R010710                    | Y                  | 91                    | Not in list of 1:1           |           |
| CEL     | Pob_R018439                    | Y                  | 68                    | Not in list of 1:1           |           |
| INS     | Pob_R016749                    | Y                  | 99                    | Not in list of 1:1           |           |
| GATA6   | Pob_R015971                    | Y                  | 87                    | Not in list of 1:1           |           |
| SLC19A3 | Pob_R002765                    | Y                  | 85                    | Not in list of 1:1           |           |
| GPSM1   | Pob_R018481                    | Y                  | 99                    | Not in list of 1:1           |           |
| IER3IP1 |                                | N                  |                       |                              |           |
| TM6SF2  |                                | N                  |                       |                              |           |
| SLC2A2  |                                | N                  |                       |                              |           |

## 10. MOLECULAR MODELLING

We downloaded the structure of hamster Pdx1 homeodomain bound to DNA (PDB ID 2h1k) and used chains b, e and f (43) as recently done by other groups (44-45). The amino acid sequence of the hamster Pdx1 homeodomain is 100% identical to that of mouse, human and most vertebrates, and the inferred ancestral vertebrate Pdx1 sequence, so can be considered the 'normal' Pdx1 structure. For hamster the sequence of the simulated target DNA was 5'-TCTCTAATGAGTTTC-3' in complex with 5'-AGAAACTCATTAGAG-3'. For sand rat (*Psammomys obesus*) the sequence of the simulated target DNA was 5'-TCCTTAATGGGCCAA-3' in complex with 5'-ATTGGCCCATTAAGG-3'; this sequence is derived from the orthologous region of the *insulin* gene in the sand rat genome determined in this study. For hamster (= normal vertebrate) the sequence of the simulated protein used was RTRTAYTRAQLLELEKEFLFNKYISRPRRVELAVMLNLTERHIKIWFQNRMRMKWKK.

For sand rat the sequence of the simulated protein was

RTRTLYTRAQRLELEKEFLFSRYVARPRRVELARALNLTEKHVKVWFQNRMRWKR.

The simulated protein sequences correspond to residues 3 to 58 of the commonly accepted nomenclature for the homeodomain proteins. We used the software package Rosetta (46) to make *in silico* point mutations on the protein and on the DNA to obtain the sand rat system starting from the hamster structure. We also prepared two "hybrid systems", HYB-1 and HYB-2, to understand the affinity of binding for all the combinations of protein-DNA complexes. The HYB-1 system consists of the protein with the hamster sequence bound to target the DNA with the sand rat sequence. The HYB-2 system of the protein with the sand rat sequence bound to the target DNA with the hamster sequence.

We performed molecular dynamics simulations with the Gromacs package (47) and the atomistic force-field Amber99SB-ildn-star for protein (48-51), with Parmbsc0 corrections for DNA and RNA ported from Amber to Gromacs format (52-53), with Chi-OL3 corrections for RNA (54) and ions from (55) as downloaded from the Bussi github page (56). The protein-DNA complexes were solvated and counter-ions added to neutralise the total charge.

The molecular dynamics simulations were performed following a standard procedure that consists of two phases: the first phase consists of equilibrating the system to reach thermodynamic stability at 300 K and 1 atm; the second phase is the 'production phase' that is a molecular dynamics simulation of 200 ns at 300 K and 1 atm from which 10,000 conformers of the protein-DNA complexes were extracted to run the analysis. The enthalpy of binding between Protein and DNA and the contribution per residue to the enthalpy of binding were calculated from the selected conformers with MMPBSA (Molecular Mechanics Poisson Boltzmann Surface Area) using the single trajectory approach (57-58). Calculations were performed using a reduced system with respect to the simulated one to have 14 complete Watson-Crick pairs per strand: for hamster the sequence of the DNA was 5'-CTCTAATGAGTTTC-3' in complex with 5'-GAAACTCATTAGAG-3', for sand rat the sequence of the DNA simulated was 5'-CCTTAATGGGCCAA-3' in complex with 5'-TTGGCCCATTAAGG-3'.

Figures of protein-DNA complexes have been generated using VMD (59). The statistical analysis was performed with the Python programming language (60).

## 11. PROMOTER CONSERVATION OF PDX1 DOWNSTREAM TARGET GENES

We downloaded the upstream promoter regions from three Pdx1 target genes, namely *insulin* (*Ins*), *somatostatin* (*Sst*) and *glucokinase* (*Gck*). Sequence from mouse (*Mus musculus*), rat (*Rattus norvegicus*) and chinchilla (*Chinchilla lanigera*) were downloaded from Ensembl and the sequences for sand rat (*Psammomys obesus*) were extracted from our final genome assembly. All sequences terminate at the start codon. Multiple sequence alignment was carried out using ClustalW (41) and conserved Pdx1 binding sites were subsequently annotated manually. We detect negligible mutation in the conserved Pdx1 binding sites in the *insulin* (A1, A2 and A3 (61)), *somatostatin* (UE-B, TAAT1 and TAAT2 (62)) and *glucokinase* (UPE1 and UPE3 (63)) promoters (Figures S7-S9).

## 12. SELECTION ANALYSIS

### GC-biased mutation in the sand rat

We counted the A/T and G/C mutations in a pairwise manner between sand rat, rat and mouse in genes located in the mutation hotspot region and randomly selected locations. Coding and intron sequences of sand rat, rat and mouse were extracted and aligned using MUSCLE (36) (version v3.8.31) and MAFFT (33) (version v7.222), respectively, with mutation types counted according to the generated alignments (Table S11). For genes located within the mutation hotspot, both protein coding and intronic regions presented a significantly elevated “W to S” (“weak” A/T to “strong” G/C) mutation rate in the sand rat compared to gene sequences from this region in Mouse and Rat. We also compared this with 100 randomly selected genes in the sand rat genome (Table S12), which showed that genes in the hotspot region are strongly biased towards GC when compared to genes located in other genomic regions.

A3

```

H. sapiens      Ins  1  GGCCCCTGGTTAAGACTCTAATACCCGGCTGGTCTGAGGAAAGAGGTGCTT
M. musculus    Ins1  1  GGTC CCTTATTAAGACTCTAATACCC--TAAGACTAAGTA-GATGTGTT
M. musculus    Ins2  1  GGCCCCTTGTTAAGACTCTAATTACCC--TAGGACTAAGTA-GAGGTGTT
R. norvegicus  Ins1  1  GGCCCCTTGTTAATTAATCTAATTACCC--TAGGCTAAGTA-GAGTGTGT
R. norvegicus  Ins2  1  GAGCCCCTATTAAGACTCTAATTACCC--TAGGCTAAGTA-GAGGTGTT
P. obesus      Ins  1  -GCCCCTTGTTAGGACCTAATTACCC--TAGTGCTAAGTA-GAGGTGCT
consensus      1  ...*****.*****.*****.*****.*****.*****.*****

```

```

H. sapiens      51  GACGACCAAGGAGATCTTCCACAGACCAGCACCAGGGAAATGGTCTGG
M. musculus    48  GATGTCCAATGAGTGTCTTTCGCAGACCTAGCACCAGGCAAGTGTGTTGG
M. musculus    48  GACGTCCAATGAGCGCTTTCGCAGACCTAGCACCAGGGAAGTGTGTTGG
R. norvegicus  48  GACGTCCAATGAGCGCTTTCGCAGACTTAGCACATAGGCAAGTGTGTTGG
R. norvegicus  48  GTTGTCCAATGAGCACTTTCGCAGACCTAGCACCAGGCAAGTGTGTTGG
P. obesus      47  GACGTCCAAGGAGAGCTTTCGCAGACCAGCATGGGAAGTGTGTTGG
consensus      51  *..*..*****.*****.*****.*****.*****.*****.*****

```

A2

```

H. sapiens      101  AAAATGCGAGCCCTCAGCCCC--CAGCCATCTGCTGACCCOCCCACCCC--A
M. musculus    97  AAAGTGCAGCTTCAGCCCCCTCTGGCCATCTGCTTACCACCCCACTGGGA
M. musculus    97  AAAGTGCAGCTTCAGCCCCCTCTGGCCATCTGCTGACCTACCACCCCACTGGGA
R. norvegicus  97  AAAATACAGCTTCAGCCCCCTCTGCCATCTGCTTACCTACCCTCCTAGA
R. norvegicus  97  AAAGTGCAGCTTCAGCCCCCTCTGGCCATCTGCTGATCCAC-----
P. obesus      97  AAAGTGCAGCTTCAGCCCCCTCTAGCCATCTGCTGACCCACCCC--CTGGA
consensus      101  *****.*****.*****.*****.*****.*****.*****

```

A1

```

H. sapiens      147  GCCCTAATGGGCCAGGCGGCAGGGGTTGAGAGG--TAGGGGAGATGGGCT
M. musculus    147  GACCTTAATGGGCCCAAACAGCAAAGTCCAGGGGG--CAGAGAGGAGGTACT
M. musculus    147  GCCCTTAATGGGTCAAACAGCAAAGTCCAGGGGG--CAGAGAGGAGGTGCT
R. norvegicus  147  GCCCTTAATGGGCCCAAACGCAAAGTCCAGGGGG--CAGAGAGGAGGTGCT
R. norvegicus  139  --CCTTAATGGGACAAACAGCAAAGTCCAGGGGT--CAGGGGGGGGGTCT
P. obesus      145  GCCCTTAATGGGCCCAAACAGCAAGTCCAGGGGGA--CAGAGAGGAGGTGTT
consensus      151  .....*****.*****.*****.*****.*****.*****

```

```

H. sapiens      196  CTGAGACTATAAAGCCAGCGGGGCCAGCCAGCCCTCAGCCCTCCAGGAC
M. musculus    196  TTG-GACTATAAAGCTGTGGGCATCCAGTAACCCCAAGCCCTTAGTGAC
M. musculus    196  TTG-GTCTATAAAGCTAGTGGGGACCCAGTAACCAAGCCCTAAGTGAT
R. norvegicus  196  TTG-GACTATAAAGCTAGTGGGAGACCCAGTAACCCCAAGCCCTAAGTGAC
R. norvegicus  184  TTG-GACTATAAAGCTAGTGGGGATTAGTAACCCCAAGCCCTAAGTGAC
P. obesus      195  TTG-GACTATAAAGCTAGTGGAGGACCCAGTACCCCTCAGCCCTACGTGAC
consensus      201  ***.*****.*****.*****.*****.*****.*****

```

```

H. sapiens      246  AGGCTGCATCAGA--AGAGGCCATCAAGCAGGTCTGTCCAAAGGGCCCTTT
M. musculus    245  CAGCTATAATCA---GAGACCATCA-GCAAGCAGGT---ATGTACTCTC
M. musculus    245  CCGCTACAATCA---AAGACCATCA-GCAAGCAGGA---AGGTACTCTT
R. norvegicus  245  CAGCTACAATCA---TAGACCATCA-GCAAGCAGGT---ATGTACTCTC
R. norvegicus  233  CAGCTACAATCA---GAAACCATCA-GCAAGCAGGT---ATGTACTCTC
P. obesus      244  CAGCTACAATCAATCAGAGACCATCA-GCAAGCGGT---ATGTACTCTC
consensus      251  ..*****.*****.*****.*****.*****.*****

```

```

H. sapiens      294  GCGTCAAGGTGGGCTCAGGATTCAGGGTGGCTGGACCCAGGCCCCAGCT
M. musculus    287  ---CTCTTTGGGGCTGGCTCCCCAGCCAA---GACTCCAGC---GACT
M. musculus    287  ---CTCAGTGGGGCTGGCTCCCCAGCTAA---GACTCCAGG---GACT
R. norvegicus  287  ---CTGGGTGAGCCGGTTCCCCAGCCAA---AAGTCTAAGG---GACT
R. norvegicus  275  ---CAGGGTGGGGCTGGCTCCCCAGTCAA---GACTCCAGG---GATTT
P. obesus      290  ---CTCCCAGGGCTGGTTTCCAGCCAA---GACTCCAGG---GACT
consensus      301  .....*****.*****.*****.*****.*****

```

```

H. sapiens      344 CTGCAGCAGGGAGGACGTGGCTGGGCTCGTGAAGCATGTGGGGGTGAGCC
M. musculus    326 TT-----AGGGAGATGTGG-----GCTCCTCTCTTACATGGA-----
M. musculus    326 TG-----AGGTAGGATATAG-----CCTCCTCTCTTACGTGAA-----
R. norvegicus  327 TT-----AGGAAGGATGTGG-----GTTTCCTCTCTTACATGGA-----
R. norvegicus  315 TG-----AGGGAAGCTGTGG-----GCTCTTCTCTTACATGTA-----
P. obesus      329 TG-----AGGAAGGATGTGG-----GCTCCTGTCTTTTCATGGA-----
consensus      351 .          ***.*.....*.*          ..***.*.....***..

H. sapiens      394 CAGGGGCCCAAGGCAGGGCACCTGGCCTTCAGCCTGCCTCAGCCCTGCC
M. musculus    359 -----TCTTTTGCTAGCCTCAACCCTGCC
M. musculus    359 -----ACTTTTGCTATCTCTCAACCCAGCC
R. norvegicus  360 -----CCTTTTCCTAGCCTCAACCCTGCC
R. norvegicus  348 -----CCTTTTGCTAGCCTCAACCCTGAC
P. obesus      362 -----CATTTTGCCAGCCTCAACTTGCC
consensus      401          ..**.*.....*****.*.....*.*

H. sapiens      444 TGTCTTCCAGATCACTGTCCCTCTTGCATG
M. musculus    383 TATCTTTCAGGTCATTGT---TTCAACATG
M. musculus    383 TATCTTCCAGGTATTGT---TTCAACATG
R. norvegicus  384 TATCTTCCAGGTCATTGT---TCCAACATG
R. norvegicus  372 TATCTTCCAGGTCATTGT---TCCAACATG
P. obesus      386 TGTCTTCCAGGTACCGT---TCCATCATG
consensus      451 *.***..***.*.*.*.*          *.....*****

```

**Figure S7.** Alignment of the upstream insulin promoter from human, mouse, rat and sand rat. The conserved Pdx1 binding regions A1, A2 and A3 are highlighted in red.



```

H. sapiens      524 GGGCGCCTCCTAGCCTGACGTCAGAGAGAGAGATTTAAAAACAAGAGGGAGACCCTTGAGAGC
M. musculus    490 GGGCGCCTCCTTGGCTGACGTCAGAGAGAGAGATTTAAAA--AGGGGAGACCCTGGAGAGC
R. norvegicus  489 GGGCGCCTCCTTGGCTGACGTCAGAGAGAGAGATTTAAAA--AGGGGAGACCCTGGAGAGC
P. obesus      483 GGGCGCCTCCTTGGCTGACGTCAGAGAGAGAGATTTAAAA--GGGGGAGACCCTGGAGAGC
consensus      483 *****.*.*****.*.*****.*.*****.*.*****.*.*****.*

H. sapiens      585 ACACAAGCCGCTTTAGGAG-CGAGCTTCGGAGCCATCGCTGCTGCCTGCTGATCCGCGCC
M. musculus    549 TCCATAGCGGCTGAAGGAGACGCTAC-CGAAGCCGTCGCTGCTGCCTGAGGACCTGCGAC
R. norvegicus  548 TCGATAGCGGCTGAAGGAGACGCTAC-TGGAGTCGTCTCTGCTGCCTGCGGACCTGCGTC
P. obesus      542 TCGAAAGCGGCTGAAGGAGACGCTACACGGAGCCGTCGCTGCTGCCTGCGGACCTGCTTC
consensus      542 ...***.*.*.*****.*.*****.*.*****.*.*****.*.*****.*

H. sapiens      645 TAGAGTTTGACCAGCCACTCTCCAGCTCGGCT-TTCGGGC-GCCGAGATG
M. musculus    609 TAGA--CTGACCCACCGCGCTCCAGCTTGGCTGCTGAGGCAAGGAAGATG
R. norvegicus  608 TAGA--CTGACCCACCGCGCTCAAGCTCGGCTGCTGAGGCAAGGGGAGATG
P. obesus      603 TAGA--CTGACCCACCGCGCTCCAGCTAGGCTGCTGAGGCCGGGGAGATG
consensus      601 *****.*.*****.*.*****.*.*****.*.*****.*.*****.*

```

**Figure S8.** Alignment of the upstream somatostatin promoter from human, mouse, rat and sand rat. The conserved Pdx1 binding regions UE-B, TAAT1 and TAAT2 are highlighted in red.

UPE-1

```

H. sapiens      1  GCCTGAGACACTGCCCCAGGATCTGAACAGGTGGAAAGGCTTAACAGGCTAGCGGTAC
M. musculus    1  CACCAAGGCACTGACCTGGGAACTAAGCAGGTGGTAATGTCTACCAAGCTGGCAGTCAC
R. norvegicus  1  CACTAAGGCACTGACCTGGGAACTAAGCAGGTGGTAATGTCTACCAAGCTGGCAGTCAC
P. obesus      1  CACCAAGGCACTGACCTAGGAACTAAGCAGGTGGTAATGTCTACCAAGCTGGCAGTCAC
consensus      1  *.*.**.*.*****.*.***.*.*****.*.*.***.*.***.*.*****

```

```

H. sapiens      61  TGTAGTGACAAGCGGATTGAGTGGTCACCATGGTGATGGGGATGGA--GGCTCTTTGCCA
M. musculus    60  TGTGGTGACAGGGTGACAGAGTGGTCACCATGGTGACAGGAGTAGAGAGGCCTTTGGCA
R. norvegicus  60  TGCAGTGACAGGGTGACAGAGTGGTCACCATGGTGACAGGAGTAGAGAGGCCTTTGGCCA
P. obesus      60  TGCAGTGACAGGGTGACAAGTGGTCACCATGGTGATGGGAGTAGA--GGCTCTGGCCA
consensus      61  **.*.*****.*.***.*.*****.*.***.*.***.*.***.*.***.*

```

UPE-3

```

H. sapiens     119  CCAGTCCCAGTTTTATGTCATGGCAGCTCTAATGACAGATGGTCAAGCCCTGCTGAGGCCA
M. musculus   120  TCAGTCCCAGTTTTCTGTCATGGTGGCTCTAATGACAGCAATGGTCA-----
R. norvegicus 120  TCAGTCCCAGTTTTCTGTCATGGTGGCTCTAATGACAGCAATGGTCA-----
P. obesus     118  TCAGTCCCAGTTTTCTGTCATGGTAGCTCTAATGACAGCAATGGTCA-----
consensus     121  .*****.*.***.*.*****.*.***.*.***.*.***.*.***.*

```

```

H. sapiens     179  CTCCTGGTCAACATGACAACCACAGGCCCTCTCAGGAGCACAGTAAGCCCTGGCAGGAGA
M. musculus   165  -----CCATAGAAACCACAGGCCCTCCAGGAGCACAG--AGGCCTGACAGGAGA
R. norvegicus 165  -----CCATAGAAACCACAGGCCCTCTCAGGAGCACAG--AGGCCTGACAGGAGA
P. obesus     163  -----CCATAGAAACCACAGGCCCTCTCAGGAGCACAG--AGGCCTGGCAGGAGA
consensus     181  ***.*.*****.*.***.*.*****.*.***.*.***.*.***.*

```

```

H. sapiens     239  ATCCCCTACTCCACACCTGGCTGGAGCAGGAAATCCCGAGCCGGCTGAGCCCAGGGA
M. musculus   214  --CATCTACTCCACACCTGGTTGGAACAG--AAGCATCGA--CTGTGACTGAGCCC--AGAGA
R. norvegicus 214  --CATCTACTCCACACCTGGTTGGAACAG--AAACATCGA--CTGTGACTGAGCTC--GGAGA
P. obesus     212  --AATCTACTCCACACCTGGTTGGAACAG--AAGCATCGA--CTGTGCTGAGCCC--AGAGA
consensus     241  ...*.*.*****.*.***.*.***.*.***.*.***.*.***.*.***.*

```

```

H. sapiens     299  AGCAGGCTAGGATGTGAGAGACAAG--TCACCTGCAGCCTAATTACTCAAAGCTGTCC
M. musculus   269  AGAAAGCTGAGGCGTGAGGGACAGAGATTACCTGTGCCTCATTACTCAAAGCCATCC
R. norvegicus 269  AGAAAGCTGAGGCGTGAGGGACAGAG--TTACCTGTGCCTCATTACTCAAAGCCATCC
P. obesus     267  AGAAAGCTGAGGCGTGAGGGACAG---TTACCTGTGCCTCATTACTCAAAGCCATCT
consensus     301  **.*.***.*.***.*.***.*.***.*.***.*.***.*.***.*.***.*

```

```

H. sapiens     357  CCAGGTCACAGAGGGGAGAGACCTTTTCCCACTGAATCTGTCTGAGGCACACTAAG--CC
M. musculus   329  CCAAGCCACTGGAGGGAGAG--ACCTTTTGTGCTGAGTCCGTCTAGAGGCCACCAATTCCCT
R. norvegicus 327  CCAGGCCACAGAGGGGAGAG--ACCTTTTGTGCTGAGTCTGTCTAGAGGCCACCGTTCCCT
P. obesus     323  CCAAGCCACTGGAGGGAGAG--ACCTTCTCTGCTGAGTCTTCTAGAGGCCACCAATTCCCT
consensus     361  **.*.***.*.***.*.***.*.***.*.***.*.***.*.***.*.***.*

```

```

H. sapiens     416  CACAGCTCAACACATCCAGGAGAGAA-----AGCCCTGAGGACGCCACCAAGCGGCCA
M. musculus   388  CACAGCTCAGCAAGACTGGAAGAAAGTCAGTCAACACTGAGGA-----ACCAC
R. norvegicus 386  CACAGCTCAGCATAGCTAGGA--AAAGTCAGTCAACACTGAGGACATTTCCCTGGAACCAC
P. obesus     382  CA--GCTCAGCATCGCTGGAAGGAAGTCAATCAACACAGAGGACCTTTCCTCTGAAACCAC
consensus     421  **.*.***.*.***.*.***.*.***.*.***.*.***.*.***.*.***.*

```

```

H. sapiens     470  GCAATGGCCCTGCTGGAGAACATCCAGGCTCAGTGAGGAAGGGTCCAGAGGGGAATGCT
M. musculus   436  ---ATGGCTCCTCCTGAAGACCG--CTGGGCC---TGAGGA--GGCCTTGGTGGGGAGGGG
R. norvegicus 445  ---ATGGCCCTCCTAGAGCCTG--CTGGGCC---TGAGGA--GGCCTTGGTGGGGAGGGG
P. obesus     440  ---ATGGCTCCTCCTGGAGAATG--CTGGGCC---TGAGGA--GGCCTTGGTAGAGAGGGC
consensus     481  *****.*.***.*.***.*.***.*.***.*.***.*.***.*.***.*

```

```

H. sapiens     530  TGCCGACTCGTTGGAGAACAAATGAAAAGGAGGAACTGTGACTGAACCTCAAACCCCAA
M. musculus   487  TCCAGA-----AGTGAACAATGAAAAGGAGGAACTGTGGCT-----TCAA

```



```

R. norvegicus 496 TCCAGA-----AGTGAACAATGAAAAAGAGGAAGCTGTGGCT-----TCAA
P. obesus     491 TCCTGA-----AGAGAACAATGAAAAAGAGGAAACTGTGACT-----TCAA
consensus     541 *.**.*      .* *****.*****.*****.*****.*

```

  

```

H. sapiens    590 CCAGCCCGAGGAGAACCACA--TCTCCAGGGACCCAGGGCGGGCCGTGACCCTGCGGC
M. musculus   528 CCAGCCTGAGGTGGACGGCAGAGCTCTCTGAGGTCCGGGCTGGCTGTGACTCTGTGGGG
R. norvegicus 537 CCAGCCTGAGGCGGACATCATCGTTCTCTGAGGTCCGGTCTGGCTGTGACTCCGTGAGA
P. obesus     532 CCAGCCTG-----TGTCTCTGAGGCCCCGTCTGGCCGTACTCTGTGGGA
consensus     601 *****.*... ..**.*.*.*.*.*.*.*.*.*.*.*.*.*.*.*.*

```

  

```

H. sapiens    649 GGAGAAGCCTTGGATATTTCACTTCAGAACTACTGGGGAAGCTGAGGGG-TCCCAG
M. musculus   588 GAAG---TCTGGGCTACTTCTGCTTTGGAAAGCTGCTGCGGAACACTGAGGGG-TCCCAG
R. norvegicus 597 GAAG---CCTGGACTATTTCTACTTTGAAATCT--TGCGAACACTGAGGGGGTCCCAG
P. obesus     579 GAAGAAGCCTGGGATATT--TGCTTTAGAAATCT-----TCTGAGGGG-TCCCAG
consensus     661 *.**.....*.*.*.*.....**.*.*.*.*.*.*.*.*.*.*.*.*.*.*.*

```

  

```

H. sapiens    708 CTC-CCACGCTGGCTGCTGTGCAGATGCTGGACGACAGAGCCAGGATG
M. musculus   644 CTCACCTGGGCTGGCGGCTGGCAGATGCTGGATGACAGAGCCAGGATG
R. norvegicus 652 TTCACCTGGGCTGGTGGCTGCGCAGATGCTGGATGACAGAGCCAGGATG
P. obesus     626 CTCACCCGGGCTGGTGGCTGCA-GGAGGCTGGATGACAGAGCCAGGATG
consensus     721 .**.*.*..*****.*****.....**.*.*.*.*.*.*.*.*.*.*

```

**Figure S9.** Alignment of the upstream glucokinase promoter from human, mouse, rat and sand rat. The conserved Pdx1 binding regions UPE1 and UPE3 are highlighted in red.

**Table S11.** Comparison between the sand rat mutational hotspot and the corresponding syntenic Mouse/Rat genomic region. A significantly strong “W to S” mutation bias in the sand rat was observed in this region compared to Mouse and Rat.

|                      |                   | S to W | W to S | Chisq test p-value |
|----------------------|-------------------|--------|--------|--------------------|
| <b>Coding region</b> | Mouse to sand rat | 2,361  | 5,571  | < 2.2e-16          |
|                      | Mouse to Rat      | 1,695  | 2,028  |                    |
|                      | Rat to sand rat   | 2,414  | 5,320  | < 2.2e-16          |
|                      | Rat to Mouse      | 2,028  | 1,695  |                    |
| <b>Intron region</b> | Mouse to sand rat | 43,817 | 64,272 | < 2.2e-16          |
|                      | Mouse to Rat      | 51,946 | 64,757 |                    |
|                      | Rat to sand rat   | 45,370 | 60,488 | < 2.2e-16          |
|                      | Rat to Mouse      | 64,757 | 51,946 |                    |

**Table S12.** Comparison between the mutation hotspot and other randomly selected genomic regions in the sand rat genome. A significantly strong “W to S” mutation bias was observed compared to other regions in the sand rat genome.

|                      |                 | S to W                    | W to S  | Chisq test p-value |           |
|----------------------|-----------------|---------------------------|---------|--------------------|-----------|
| <b>Coding region</b> | Mouse to Gerbil | genes in mutation hotspot | 2,361   | 5,571              | < 2.2e-16 |
|                      |                 | genes picked randomly     | 7,596   | 8,419              |           |
|                      | Rat to Gerbil   | genes in mutation hotspot | 2,414   | 5,320              | < 2.2e-16 |
|                      |                 | genes picked randomly     | 8,581   | 9,249              |           |
| <b>Intron region</b> | Mouse to Gerbil | genes in mutation hotspot | 43,817  | 64,272             | < 2.2e-16 |
|                      |                 | genes picked randomly     | 254,189 | 260,502            |           |
|                      | Rat to Gerbil   | genes in mutation hotspot | 45,370  | 60,488             | < 2.2e-16 |
|                      |                 | genes picked randomly     | 267,180 | 259,304            |           |

## Mutational bias analysis

We also calculated the  $dS$  for genes in the region of biased mutation and also genes from other genomic locations which were picked randomly using PAML (64) (version 4.8) with the free-ratios model. For each gene, the protein sequences from sand rat and three other species of rodent (mouse, rat, Guinea pig) were aligned using PRANK (65) followed by removing any poorly aligned sites using Gblocks (66). The alignments were concatenated for 26 genes from the mutation hotspot region and 100 randomly selected genes, respectively, and passed to PAML for  $dS$  calculation. The  $dS$  trees are presented in Figure 1d and demonstrate that the mutational bias is significantly skewed towards G/C bases in the 26 genes in the mutation hotspot region in sand rat compared to the syntenic region in 3 other species of rodent and additionally when compared to 100 other randomly selected genes outside of this region.

## Analysis of vertebrate *Pdx1* dN/dS

The *Pdx1* protein sequences from sand rat and 15 other species were aligned using PRANK (65) followed by removing sites containing gaps and missing data using Gblocks (66). There are a total of 234 positions in the final CDS dataset. Ancestral states were inferred using the Maximum Parsimony method (67) in MEGA7 (68). We calculated synonymous mutation number and non-synonymous mutation number between the child nodes and ancestral nodes (Figure S10).

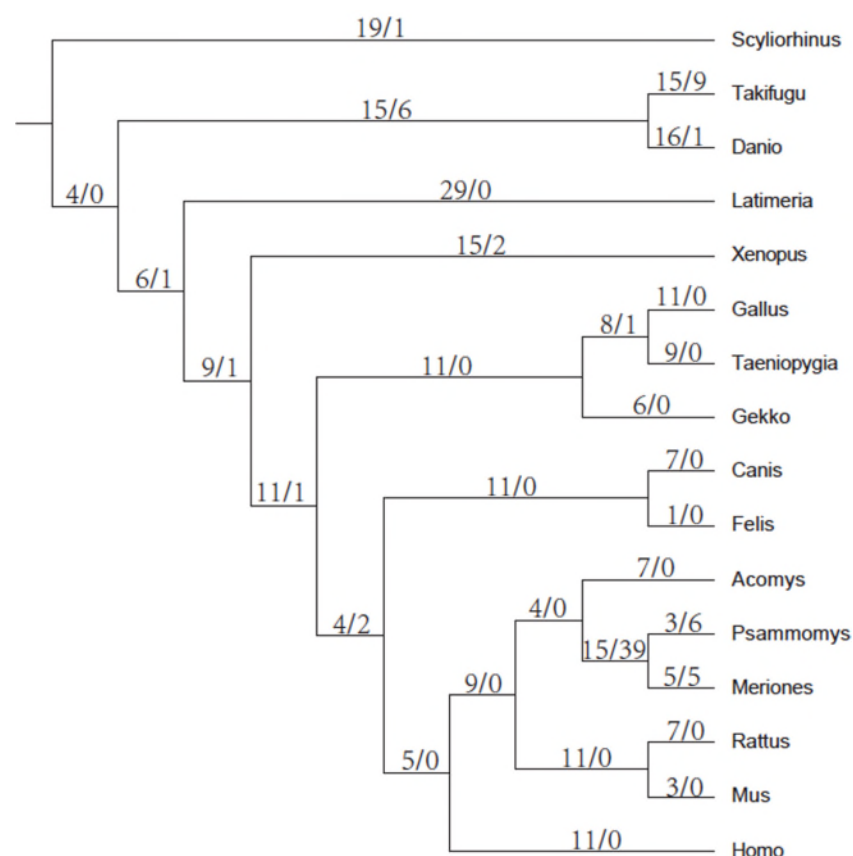

**Figure S10.** Synonymous mutation number/Non-synonymous mutation numbers were calculated for the child nodes and ancestral nodes in species tree. Ancestral states were inferred using the Maximum Parsimony method (67). The gene has accumulated significantly higher number of non-synonymous substitutions in the common ancestor of *Psammomys* and *Meriones*.

## Functional constraint

Evidence for functional constraint on the sand rat Pdx1 coding region is given by the finding that two assembled transcripts from the same animal reveal polymorphism in the 3' untranslated region but not the coding sequence (Figure S11).

CLUSTAL O(1.2.3) multiple sequence alignment

```
SANDRAT_k51_1890640      ATGGACAGAGAGGGCCGAGCCCTTCTTCGAGGCTCCTGGGCGTTCCTGGGGCCCGAGTTC
SANDRAT_k55_1486975      ATGGACAGAGAGGGCCGAGCCCTTCTTCGAGGCTCCTGGGCGTTCCTGGGGCCCGAGTTC
*****

SANDRAT_k51_1890640      GCGGCCCCCGCTCCTCCTGCCTGTTTCGAGGGTGGGGGCGGGCAGCCTCCCCCCACGCT
SANDRAT_k55_1486975      GCGGCCCCCGCTCCTCCTGCCTGTTTCGAGGGTGGGGGCGGGCAGCCTCCCCCCACGCT
*****

SANDRAT_k51_1890640      CCTCCCACGCTCCTCCCACCTCGCCCCGTGCTCCTGGACCCACCGGCCTCCAGCCG
SANDRAT_k55_1486975      CCTCCCACGCTCCTCCCACCTCGCCCCGTGCTCCTGGACCCACCGGCCTCCAGCCG
*****

SANDRAT_k51_1890640      CCCCAGCCCGGGTCCCCCGCGCCACCCGGGGCCCGACCAACCGCCCTTTCGCTGG
SANDRAT_k55_1486975      CCCCAGCCCGGGTCCCCCGCGCCACCCGGGGCCCGACCAACCGCCCTTTCGCTGG
*****

SANDRAT_k51_1890640      ATGAAGAGCAGCAAAGGCCAAGCCTGGAGCGGCCAGTGGGCAGCCCCGGCCGAGGACT
SANDRAT_k55_1486975      ATGAAGAGCAGCAAAGGCCAAGCCTGGAGCGGCCAGTGGGCAGCCCCGGCCGAGGACT
*****

SANDRAT_k51_1890640      CGAACCTGTACACGGGGCGCAGCGGCTGGAGCTGGAGAAGGAATTCCTCTTCAGCCGC
SANDRAT_k55_1486975      CGAACCTGTACACGGGGCGCAGCGGCTGGAGCTGGAGAAGGAATTCCTCTTCAGCCGC
*****

SANDRAT_k51_1890640      TACGTCGCGCGCCGCGGGCGCTGGAGCTCGCGGGGCGTGAACCTACCGAGAAGCAC
SANDRAT_k55_1486975      TACGTCGCGCGCCGCGGGCGCTGGAGCTCGCGGGGCGTGAACCTACCGAGAAGCAC
*****

SANDRAT_k51_1890640      GTGAAGGTCTGGTTCAGAACCGCCGATGCGCTGGAAGAGGGAGGAGTCCGCGCGGGGG
SANDRAT_k55_1486975      GTGAAGGTCTGGTTCAGAACCGCCGATGCGCTGGAAGAGGGAGGAGTCCGCGCGGGGG
*****

SANDRAT_k51_1890640      AGGACGGCGCCCCGGGAGGACGGAGGAGCGGGAGGCTCCCCGCCACCGTCTCCTCTCC
SANDRAT_k55_1486975      AGGACGGCGCCCCGGGAGGACGGAGGAGCGGGAGGCTCCCCGCCACCGTCTCCTCTCC
*****

SANDRAT_k51_1890640      TCCTCCTCCTCCTCCTCCTCCTCCGCGGCCCGGATGCTCCTCCTCTTCTTCCCTCCT
SANDRAT_k55_1486975      TCC-----TCCTCCTCCTCCTGCGCCCGGATGCTCCTCCTCTTCTTCCCTCCT
***                *****

SANDRAT_k51_1890640      CCTCCTCCTCCTACCGGGGACTGCGGTGAGGGGGTCGGTGACTCCTCCTCCTTCCCC
SANDRAT_k55_1486975      CCTCCTCCTCCTACCGGGGACTGCGGTGAGGGGGTCGGTGACTCCTCCTCCTCCTC
*****

SANDRAT_k51_1890640      CTCCTGCTCCTCCTCCTCCTCCTCCCTCCTCTTCTCCTCCT---CCCACTCCTCCTC
SANDRAT_k55_1486975      CTCCTCCTCCCACTCCTCCCTCCTTCTCCTCCTCCTCCTCCTCCTCCTCCTCCTC
*****

SANDRAT_k51_1890640      CTCCTCCTCCTCCTCCTCCTCCTCCTCCTCCTCCTCCTCCTCCTCCTCCTCCTCCTC
SANDRAT_k55_1486975      CTCCTCCTCCTCCTCCTCCTCCTCCTCCTCCTCCTCCTCCTCCTCCTCCTCCTCCTC
*****

SANDRAT_k51_1890640      -----
SANDRAT_k55_1486975      CCCCTCTCCTCCTCCTCCTCCTCCTCCTCCTCCTCCTCCTCCTCCTCCTCCTCCTC
```

**Figure S11.** Alignment of two sand rat Pdx1 transcripts. Red coding sequence; bold homeobox; black 3' untranslated region.

## 12. SUPPLEMENTARY REFERENCES

1. Luo R et al (2012) SOAPdenovo2: an empirically improved memory-efficient short-read de novo assembler. *GigaScience* 1: 18.
2. Marçais G, Kingsford CA (2011) Fast, lock-free approach for efficient parallel counting of occurrences of k-mers. *Bioinformatics* 27: 764-770.
3. H Wickham (2009) ggplot2: Elegant Graphics for Data Analysis. Springer-Verlag New York
4. Gregory TR (2016) Animal Genome Size Database. <http://www.genomesize.com>
5. Lander ES, Waterman MS (1988) Genomic mapping by fingerprinting random clones: a mathematical analysis. *Genomics* 2: 231-239.
6. Harris RS (2007) Improved pairwise alignment of genomic DNA. Ph.D. Thesis, The Pennsylvania State University. Available at <http://www.bx.psu.edu/~rsharris/lastz/>
7. Smit, AFA, Hubley, R & Green, P. *RepeatMasker Open-4.0*. 2013-2015 (<http://www.repeatmasker.org>).
8. Magoč T, Salzberg SL (2011) FLASH: fast length adjustment of short reads to improve genome assemblies. *Bioinformatics* 27: 2957-2963.
9. Langmead B, Salzberg SL (2012) Fast gapped-read alignment with Bowtie 2. *Nature Methods* 9: 357-359.
10. Simpson JT et al (2009) ABySS: a parallel assembler for short read sequence data. *Genome Research* 19: 1117-1123.
11. Camacho C et al (2009) BLAST+: architecture and applications. *BMC Bioinformatics* 10: 421.
12. Quinlan AR, Hall IM (2010) BEDTools: a flexible suite of utilities for comparing genomic features. *Bioinformatics* 26: 841-842.
13. Bradnam KR et al (2013) Assemblathon 2: evaluating de novo methods of genome assembly in three vertebrate species. *GigaScience* 2: 10.
14. Simão FA, Waterhouse RM, Ioannidis P, Kriventseva EV, Zdobnov EM (2015) BUSCO: assessing genome assembly and annotation completeness with single-copy orthologs. *Bioinformatics* 31: 3210-3212.
15. Lacy PE, Kostianovsky M (1967) Method for the isolation of intact islets of Langerhans from the rat pancreas. *Diabetes* 16: 35-39.
16. Lopez JA, Bohuski E (2007) Total RNA extraction with TRIZOL reagent and purification with QIAGEN RNeasy mini kit. (available at [https://wiki.cgb.indiana.edu/download/attachments/22446090/Total\\_RNA\\_Extraction\\_with\\_TRIZOL\\_Reagent\\_10172007.pdf](https://wiki.cgb.indiana.edu/download/attachments/22446090/Total_RNA_Extraction_with_TRIZOL_Reagent_10172007.pdf)).
17. Bolger AM, Lohse M, Usadel B (2014) Trimmomatic: a flexible trimmer for Illumina sequence data. *Bioinformatics* 30: 2114-2120.
18. Joshi NA, Fass JN (2011) Sickle: A sliding-window, adaptive, quality-based trimming tool for FastQ files (Version 1.33). Available at <https://github.com/najoshi/sickle>.

19. Robertson G et al (2010) De novo assembly and analysis of RNA-seq data. *Nature methods* 7: 909-912.
20. Grabherr MG et al (2011) Full-length transcriptome assembly from RNA-seq data without a reference genome. *Nature Biotechnology* 29: 644-652.
21. Haas BJ et al (2013) De novo transcript sequence reconstruction from RNA-seq: reference generation and analysis with Trinity. *Nature protocols* 8: 1494-1512. (Available at <http://transdecoder.github.io/>).
22. Bairoch A et al (2005) The Universal Protein Resource (UniProt). *Nucleic Acids Research* 33: D154-D159.
23. Smit, AFA, Hubley, R, Green P. *RepeatMasker Open-4.0*. 2013-2015 (<http://www.repeatmasker.org>).
24. Smit, AFA, Hubley, R. *RepeatModeler Open-1.0*. 2008-2015 <<http://www.repeatmasker.org>>.
25. Goubert C et al (2015) De novo assembly and annotation of the Asian Tiger Mosquito (*Aedes albopictus*) repeatome with dnaPipeTE from raw genomic reads and comparative analysis with the yellow fever mosquito (*Aedes aegypti*). *Genome Biology and Evolution* 7: 1192-1205.
26. Keller O, Kollmar M, Stanke M, Waack S (2011) A novel hybrid gene prediction method employing protein multiple sequence alignments. *Bioinformatics* 15: 757-763.
27. Birney E, Clamp M, Durbin R (2004) GeneWise and GenomeWise. *Genome Research* 14: 988-995.
28. Elsik CG et al (2007) Creating a honey bee consensus gene set. *Genome Biology* 8: R13.
29. Trapnell C, Pachter L, Salzberg SL (2009) TopHat: discovering splice junctions with RNA-seq. *Bioinformatics* 25: 1105-1111.
30. Trapnell C et al (2010) Transcript assembly and quantification by RNA-seq reveals unannotated transcripts and isoform switching during cell differentiation. *Nature Biotechnology* 28: 511-515.
31. Clarke AG et al (2003) Inferring nonneutral evolution from human-chimp-mouse orthologous gene trios. *Science* 302: 1960-1963.
32. Kinsella RJ et al (2011) Ensembl BioMarts: a hub for data retrieval across taxonomic space. *Database* 2011: bar030.
33. Katoh K, Misawa K, Kuma K-I, Miyata T (2002) MAFFT: a novel method for rapid multiple sequence alignment based on fast Fourier transform. *Nucleic Acids Research* 30: 3059-3066.
34. R Development Core Team (2008). R: A language and environment for statistical computing. R Foundation for Statistical Computing, Vienna, Austria. (<http://www.R-project.org>).
35. Zhong Y-F, Butts T, Holland PWH (2008) HomeoDB: a database of homeobox gene diversity. *Evolution and Development* 10: 516-518.
36. Edgar RC (2004) MUSCLE: multiple sequence alignment with high accuracy and high throughput. *Nucleic Acids Research* 19: 1792-1797.
37. Tamura K et al (2011) MEGA5: Molecular evolutionary genetic analysis using maximum likelihood, evolutionary distance, and maximum parsimony methods. *Molecular Biology and Evolution* 28: 2731-2739.
38. Gaulton KJ et al (2015) Genetic fine mapping and genomic annotation defines causal mechanisms at type 2 diabetes susceptibility loci. *Nature genetics* 47: 1415-1425.

39. Mahajan A et al (2015) Identification and functional characterization of G6PC2 coding variants influencing glycemic traits define and effector transcript at the G6PC2-ABCB11 locus. *PLoS Genetics* 11: e1004876.
40. Prokopenko I et al (2008) Variants in MTNR1B influence fasting glucose levels. *Nature Genetics* 41: 77-81.
41. Yamagata K et al (1996) Mutations in the hepatocyte nuclear factor-1 $\alpha$  gene in maturity-onset diabetes of the young (MODY3). *Nature* 384: 455-458.
42. Thompson JD, Higgins DG, Gibson TJ (1994) CLUSTAL W: improving the sensitivity of progressive multiple sequence alignment through sequence weighting, position specific gap penalties and weight matrix choice. *Nucleic acids research* 22: 4673-4680.
43. Longo A, Guanga GP, Rose RB (2007) Structural basis for induced fit mechanisms in DNA recognition by the Pdx1 homeodomain. *Biochemistry* 46: 2948-2957.
44. Bastidas M, Showalter SA (2013) Thermodynamic and structural determinants of differential Pdx1 binding to elements from the insulin and IAPP promoters. *Journal of Molecular Biology*. 425: 3360-3377.
45. Babin V, Wang D, Rose RB, Sagui C (2013) Binding polymorphism in the DNA bound state of the Pdx1 homeodomain. *Plos Computational Biology* 9: e1003160.
46. Leaver-Fay A et al (2011) ROSETTA3: an object-oriented software suite for the simulation and design of macromolecules. *Methods in Enzymology* 487: 545-74.
47. Abraham MJ et al (2015) GROMACS: High performance molecular simulations through multi-level parallelism from laptops to supercomputers. *SoftwareX* 1–2: 19-25.
48. Cornell WD et al (1995) A Second generation force field for the simulation of proteins, nucleic acids, and organic molecules. *Journal of the American Chemical Society* 117: 5179–5197.
49. Hornak V et al (2006) Comparison of multiple Amber force fields and development of improved protein backbone parameters. *Proteins* 65: 712–725.
50. Best RB, Hummer G (2009) Optimized molecular dynamics force fields applied to the helix–coil transition of polypeptides. *The Journal of Physical Chemistry B* 113: 9004-9015.
51. Lindorff-Larsen K et al (2010) Improved side-chain torsion potentials for the Amber ff99SB protein force field. *Proteins* 78: 1950–1958.
52. Pérez A et al (2007) Refinement of the AMBER force field for nucleic acids: improving the description of  $\alpha/\gamma$  conformers. *Biophysical Journal* 92: 3817-3829.
53. Guy AT, Piggot TJ, Khalid S (2012) Single-stranded DNA within nanopores: conformational dynamics and implications for sequencing: a molecular dynamics simulation study. *Biophysical Journal* 103: 1028-1036.
54. Zgarbová M et al (2011) Refinement of the Cornell et al. nucleic acids force field based on reference quantum chemical calculations of glycosidic torsion profiles. *Journal of Chemical Theory and Computation* 7: 2886-2902.
55. Joung IS, Cheatham TEIII (2008) Determination of alkali and halide monovalent ion parameters for use in explicitly solvated biomolecular simulations. *The Journal of Physical Chemistry B* 112: 9020-9041.
56. Bussi G <https://github.com/srnas/ff>
57. Kollman PA (2000) Calculating structures and free energies of complex molecules: Combining molecular mechanics and continuum models. *Accounts of Chemical Research* 33: 889-897.

58. Miller BR et al (2012) MMPBSA.py: An Efficient Program for End-State Free Energy Calculations. *Journal of Chemical Theory and Computation* 8: 3314-3321.
59. Humphrey W, Dalke A, Schulten K (1996) VMD - Visual Molecular Dynamics. *Journal of Molecular Graphics* 14: 33-38.
60. Python Software Foundation. Python Language Reference, version 2.7. Available at <http://www.python.org>
61. McKinnon CM, Docherty K (2001) Pancreatic duodenal homeobox-1, PDX-1, a major regulator of beta cell identity and function. *Diabetologia* 44: 1203-1214.
62. Miller CP, McGehee Jr RE, Habener JF (1994) IDX-1: a new homeodomain transcription factor expressed in rat pancreatic islets and duodenum that transactivates the somatostatin gene. *The EMBO Journal* 13: 1145.
63. Magnuson MA, Jetton TL (1993) Evolutionary conservation of elements in the upstream glucokinase promoter. *Biochemical Society Transactions* 21: 160-163.
64. Yang Z (2007) PAML 4: Phylogenetic analysis by maximum likelihood. *Molecular Biology and Evolution* 24: 1586-1591.
65. Löytynoja A, Goldman N (2005) An algorithm for progressive multiple alignment of sequences with insertions. *PNAS* 102: 10557-10562.
66. Castresana J (2000) Selection of conserved blocks from multiple alignments for their use in phylogenetic analysis. *Molecular Biology and Evolution* 17: 540-552.
67. Eck RV, Dayhoff MO (1966) Atlas of Protein Sequence and Structure. National Biomedical Research Foundation, Silver Springs, Maryland.
68. Kumar S, Stecher G, Tamura K (2016) MEGA7: Molecular Evolutionary Genetics Analysis version 7.0 for bigger datasets. *Molecular Biology and Evolution* 33: 1870-1874.
